# Supplementary material for: MYC-mediated resistance to trametinib and HCQ in PDAC is overcome by CDK4/6 and lysosomal inhibition
Source: PubMed Central journal article supplement (PMC9930170; doi:10.1084/jem.20221524), 2023-01-31

F2A

HPAF-II Tet-On c-MYC

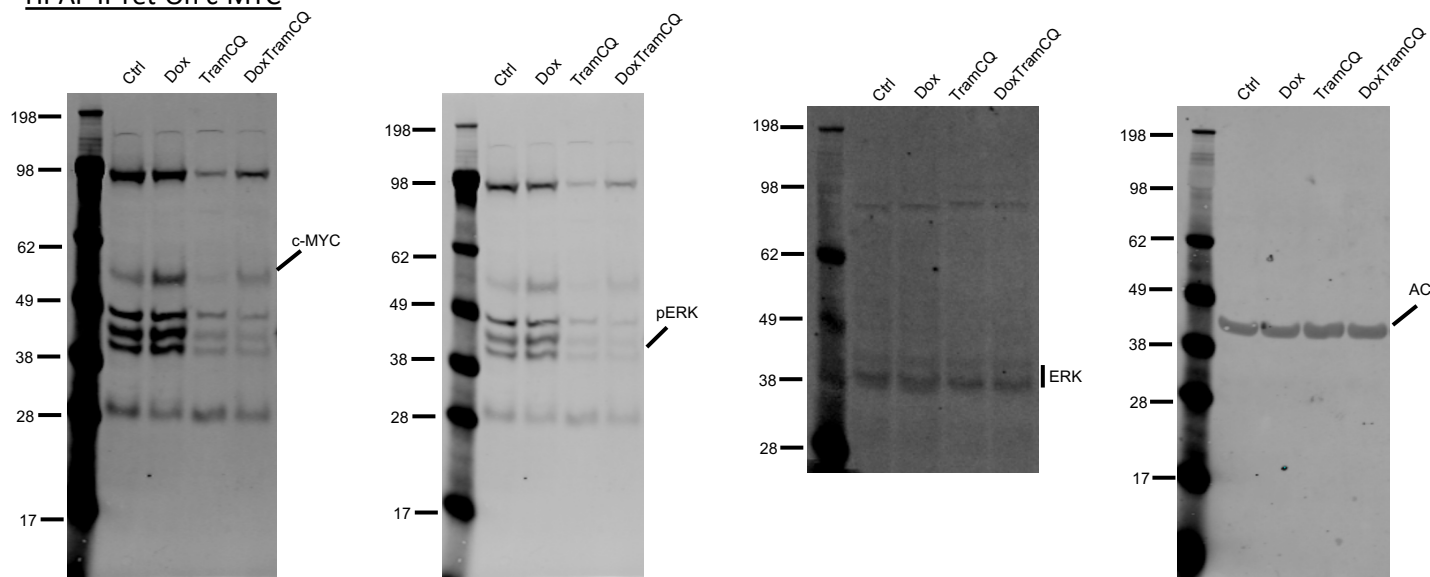

F2C

PDX220 Tet-On c-MYC

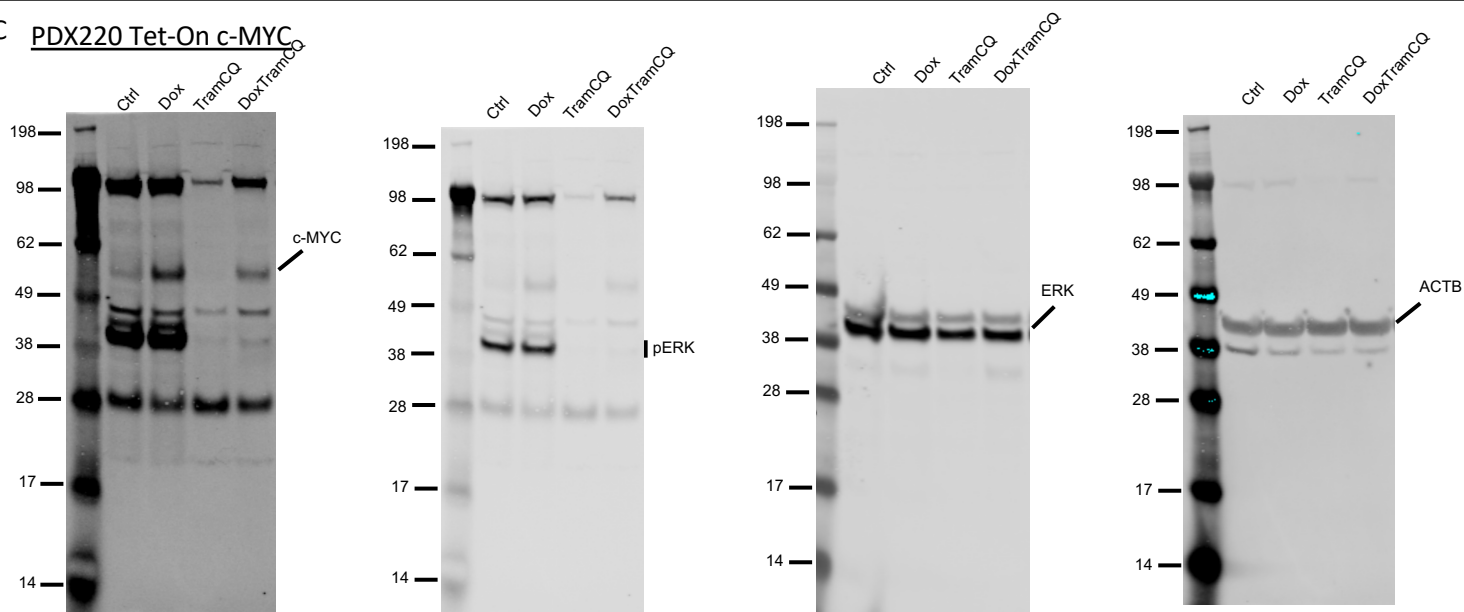

F2E

PANC-1

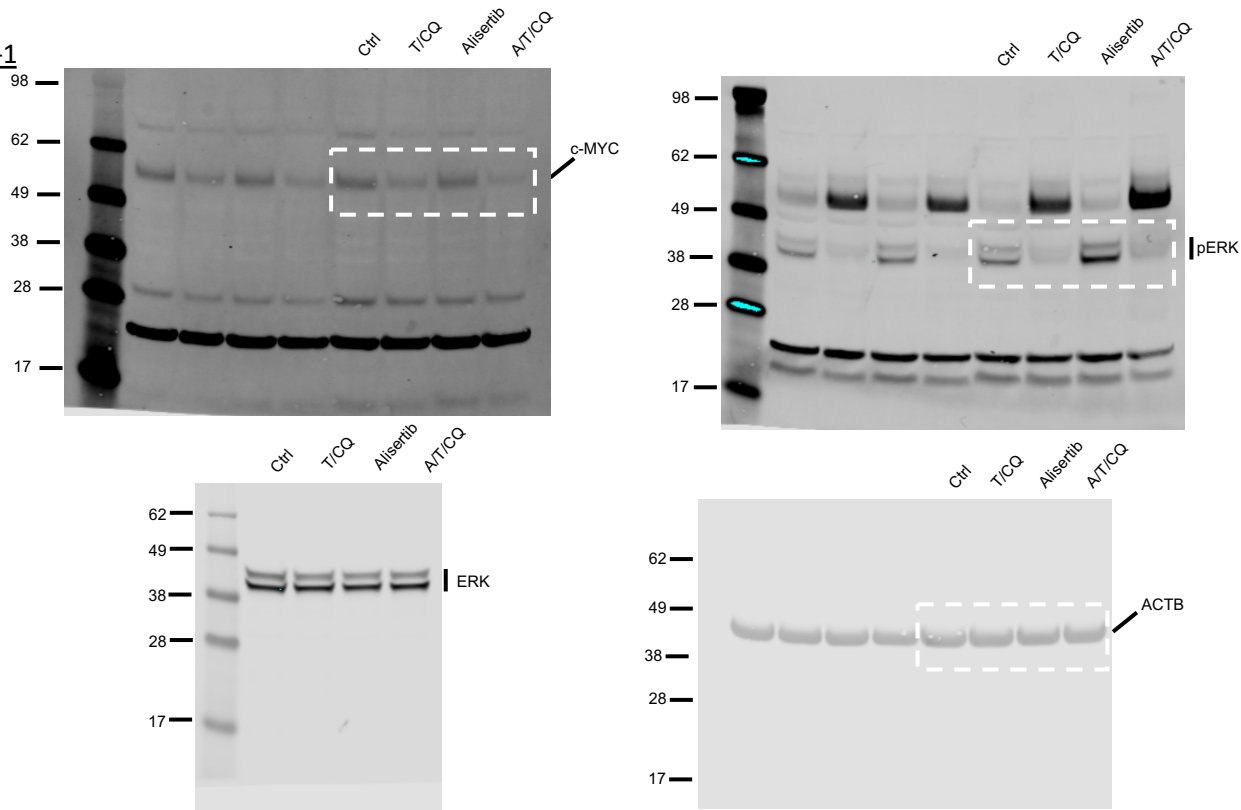

Supplement: JEM_20221524_SourceDataF2.pdf [file JEM_20221524_SourceDataF2.pdf]
