# Supplementary material for: MYC-mediated resistance to trametinib and HCQ in PDAC is overcome by CDK4/6 and lysosomal inhibition
Source: PubMed Central journal article supplement (PMC9930170; doi:10.1084/jem.20221524), 2023-01-31

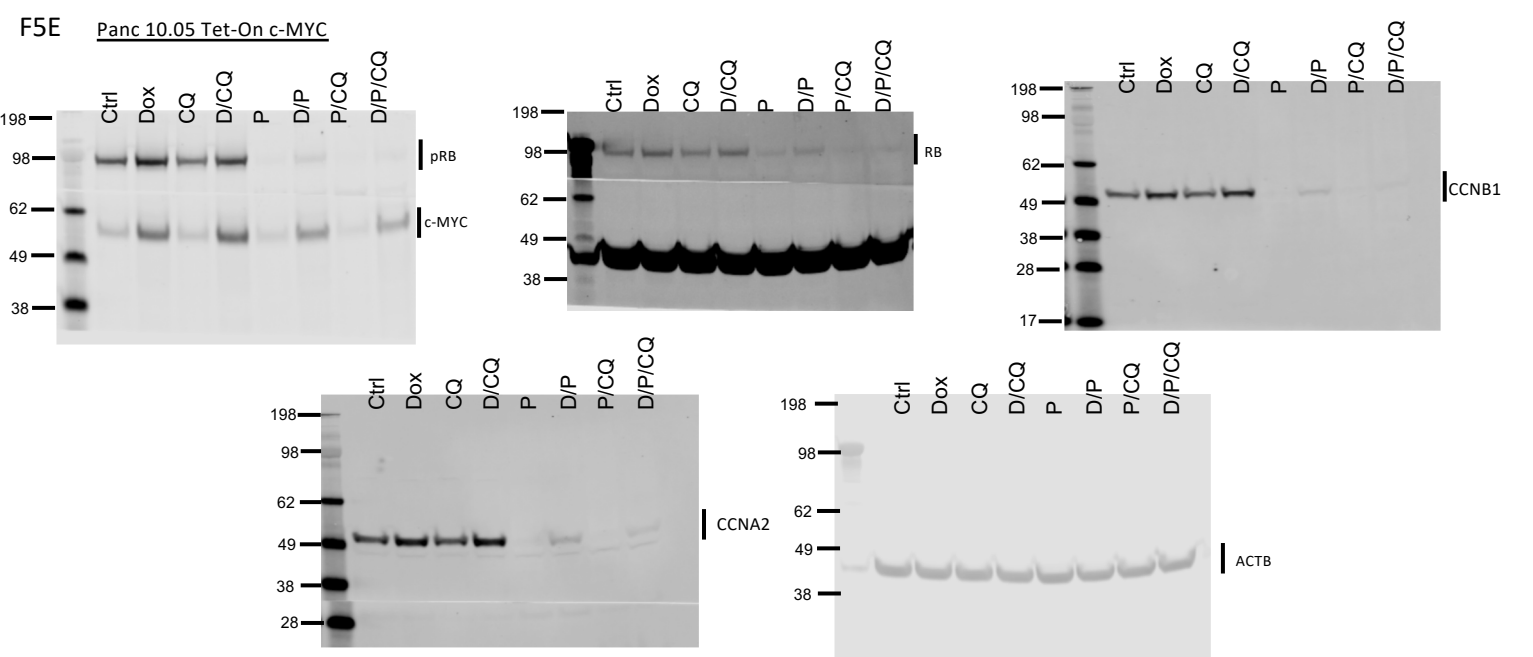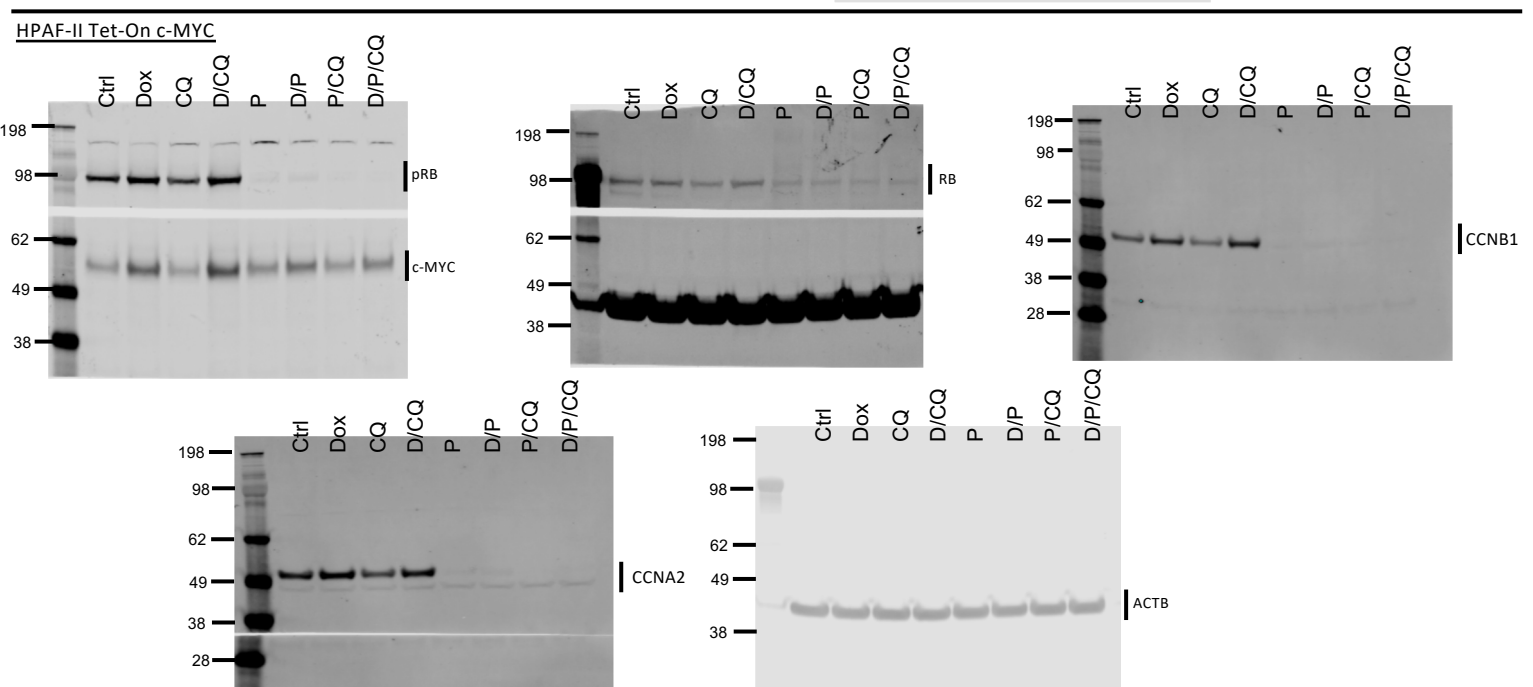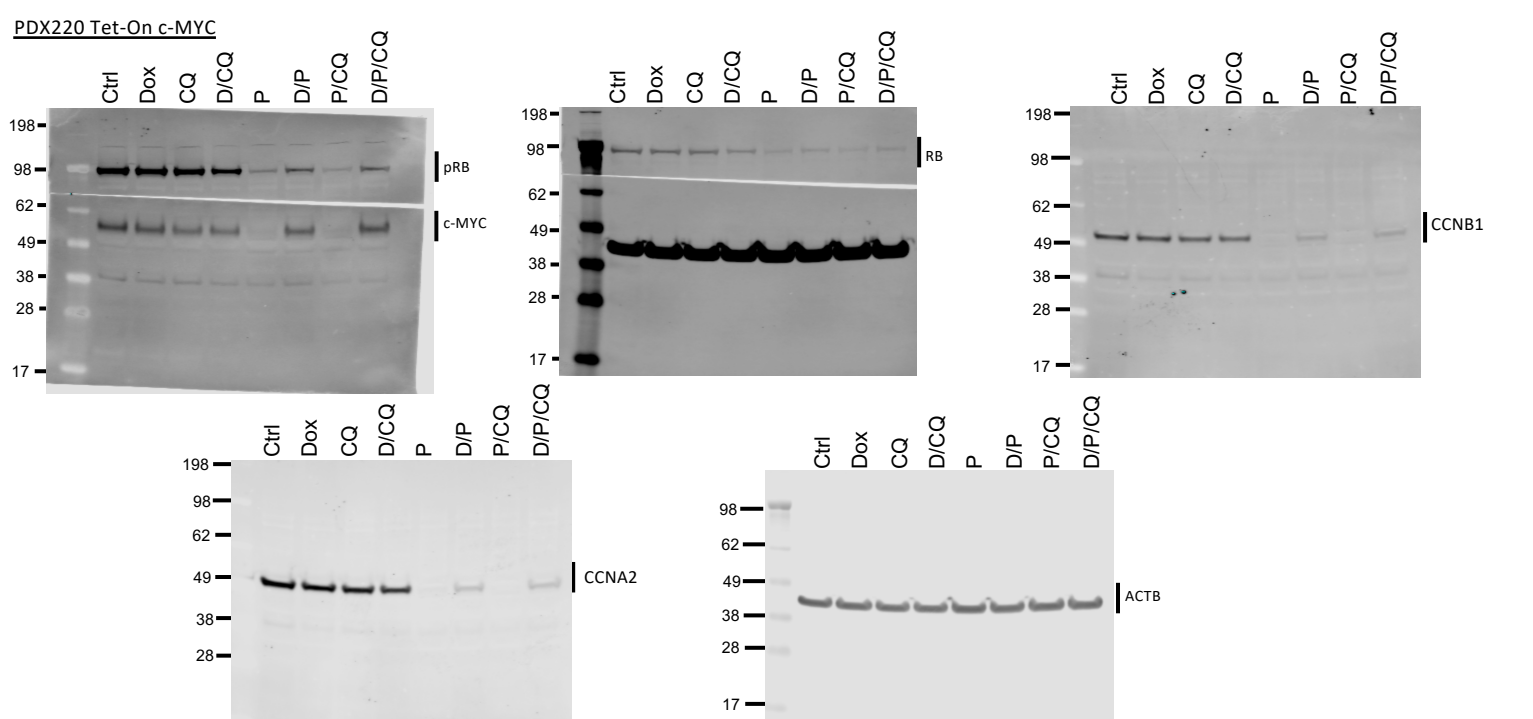

Supplement: JEM_20221524_SourceDataF5.pdf [file JEM_20221524_SourceDataF5.pdf]
