# Supplementary material for: MYC-mediated resistance to trametinib and HCQ in PDAC is overcome by CDK4/6 and lysosomal inhibition
Source: PubMed Central journal article supplement (PMC9930170; doi:10.1084/jem.20221524), 2023-01-31

HPAF-II

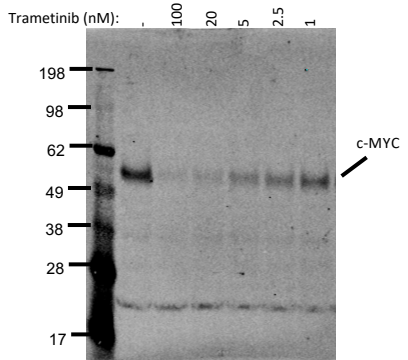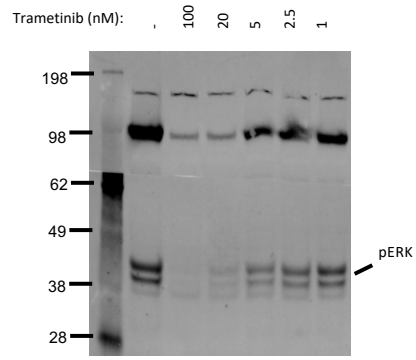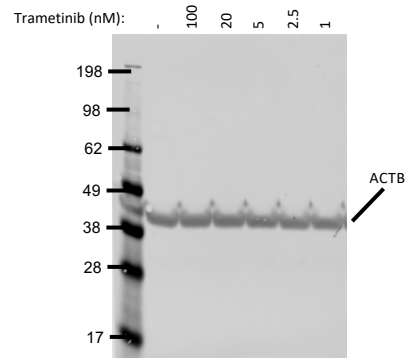

Panc 10.05

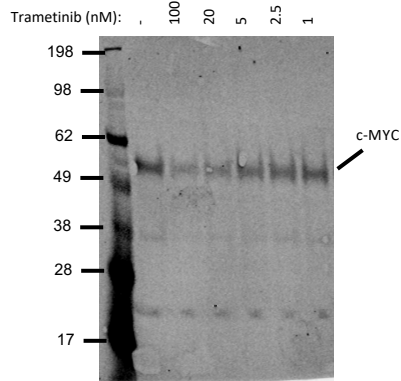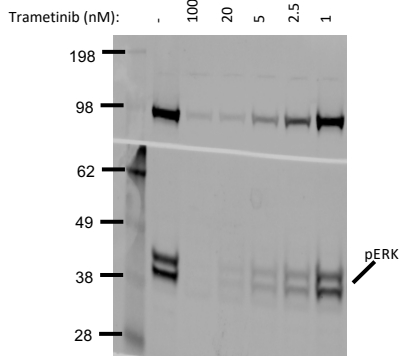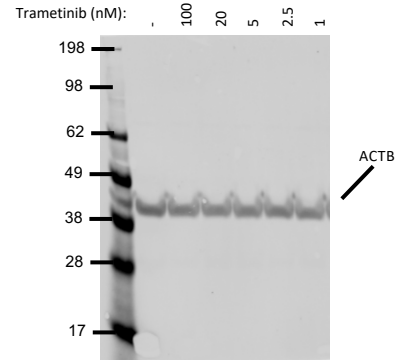

PDX220

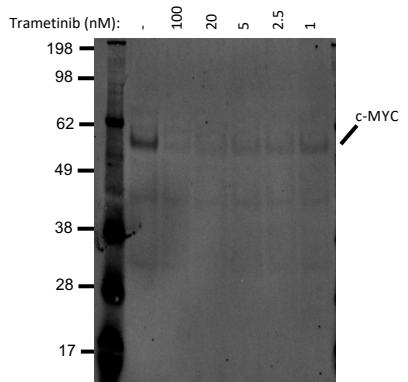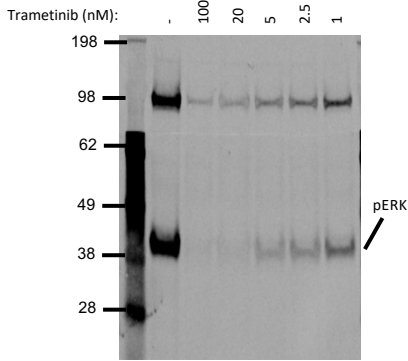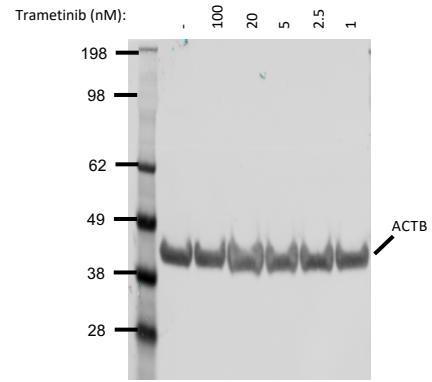

# FS1B

## PDX220 Tet-On c-MYC<sup>TS8A</sup>

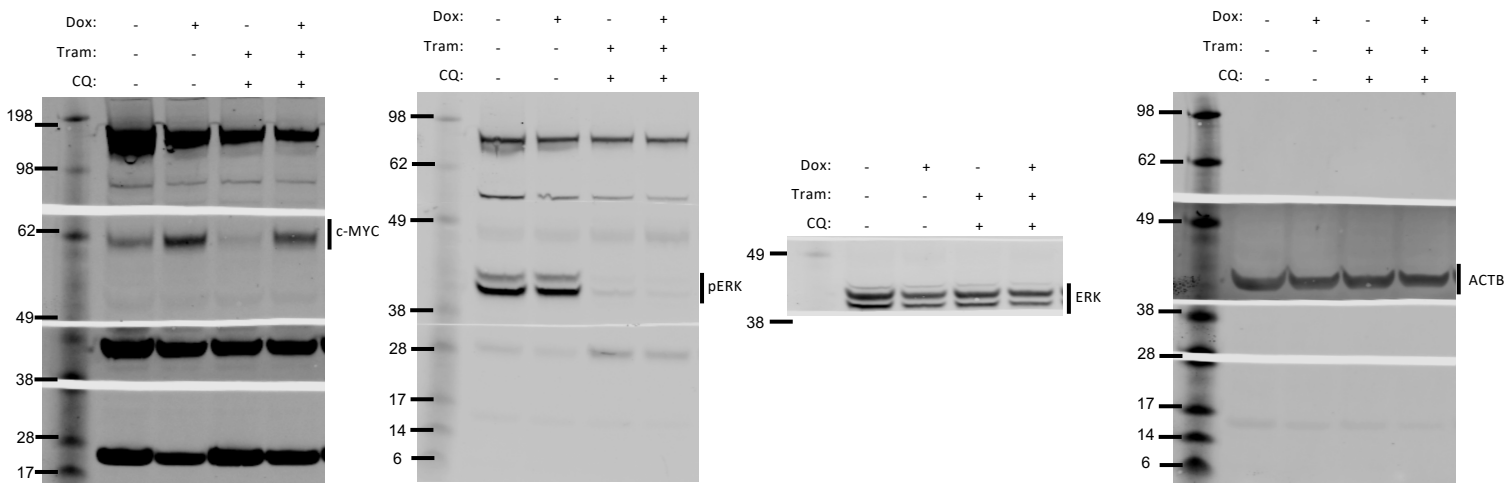

# FS1I

## PANC-1

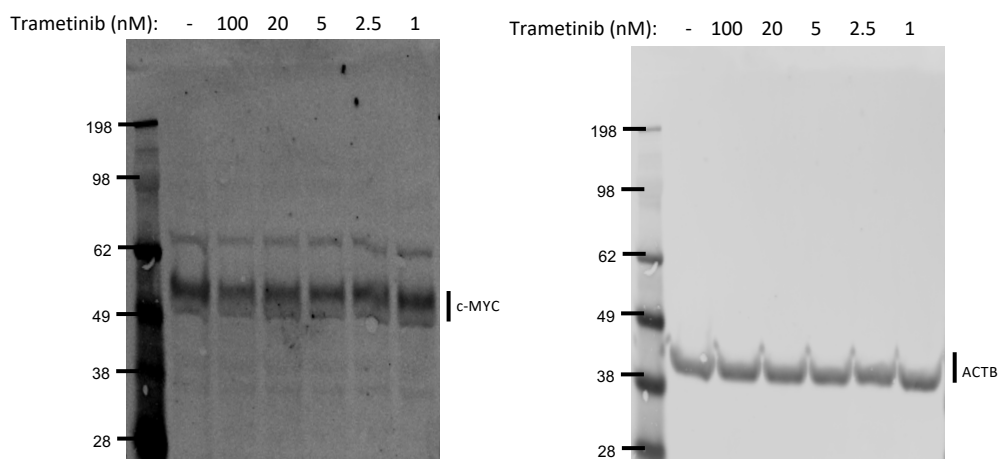

# FS1J

## PANC-1

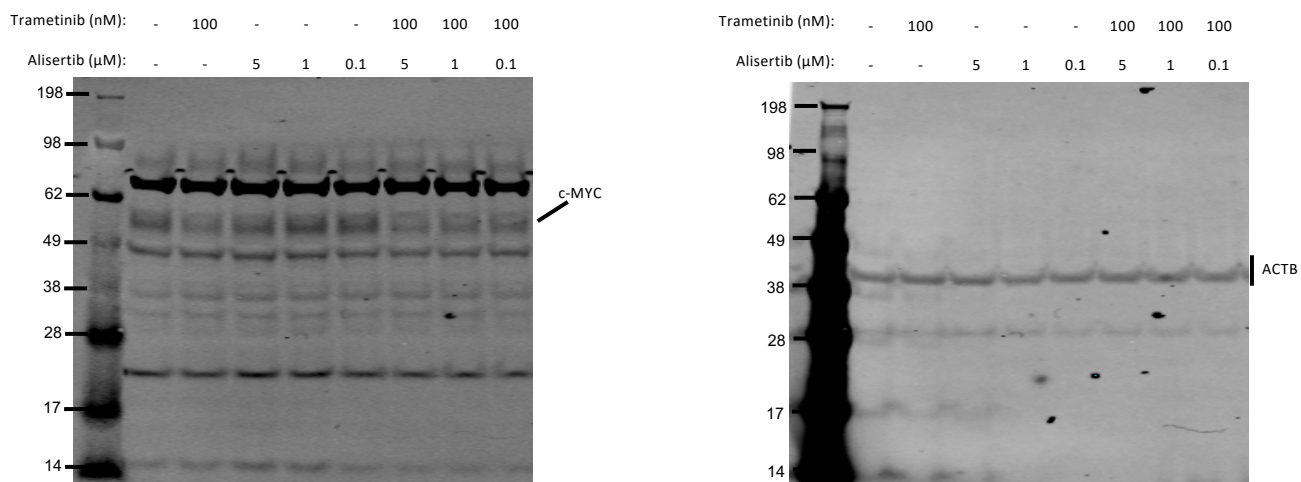

Supplement: JEM_20221524_SourceDataFS1.pdf [file JEM_20221524_SourceDataFS1.pdf]
