# Supplementary material for: MYC-mediated resistance to trametinib and HCQ in PDAC is overcome by CDK4/6 and lysosomal inhibition
Source: PubMed Central journal article supplement (PMC9930170; doi:10.1084/jem.20221524), 2023-01-31

FS2H Panc10.05 Tet-On c-MYC<sup>T58A</sup>

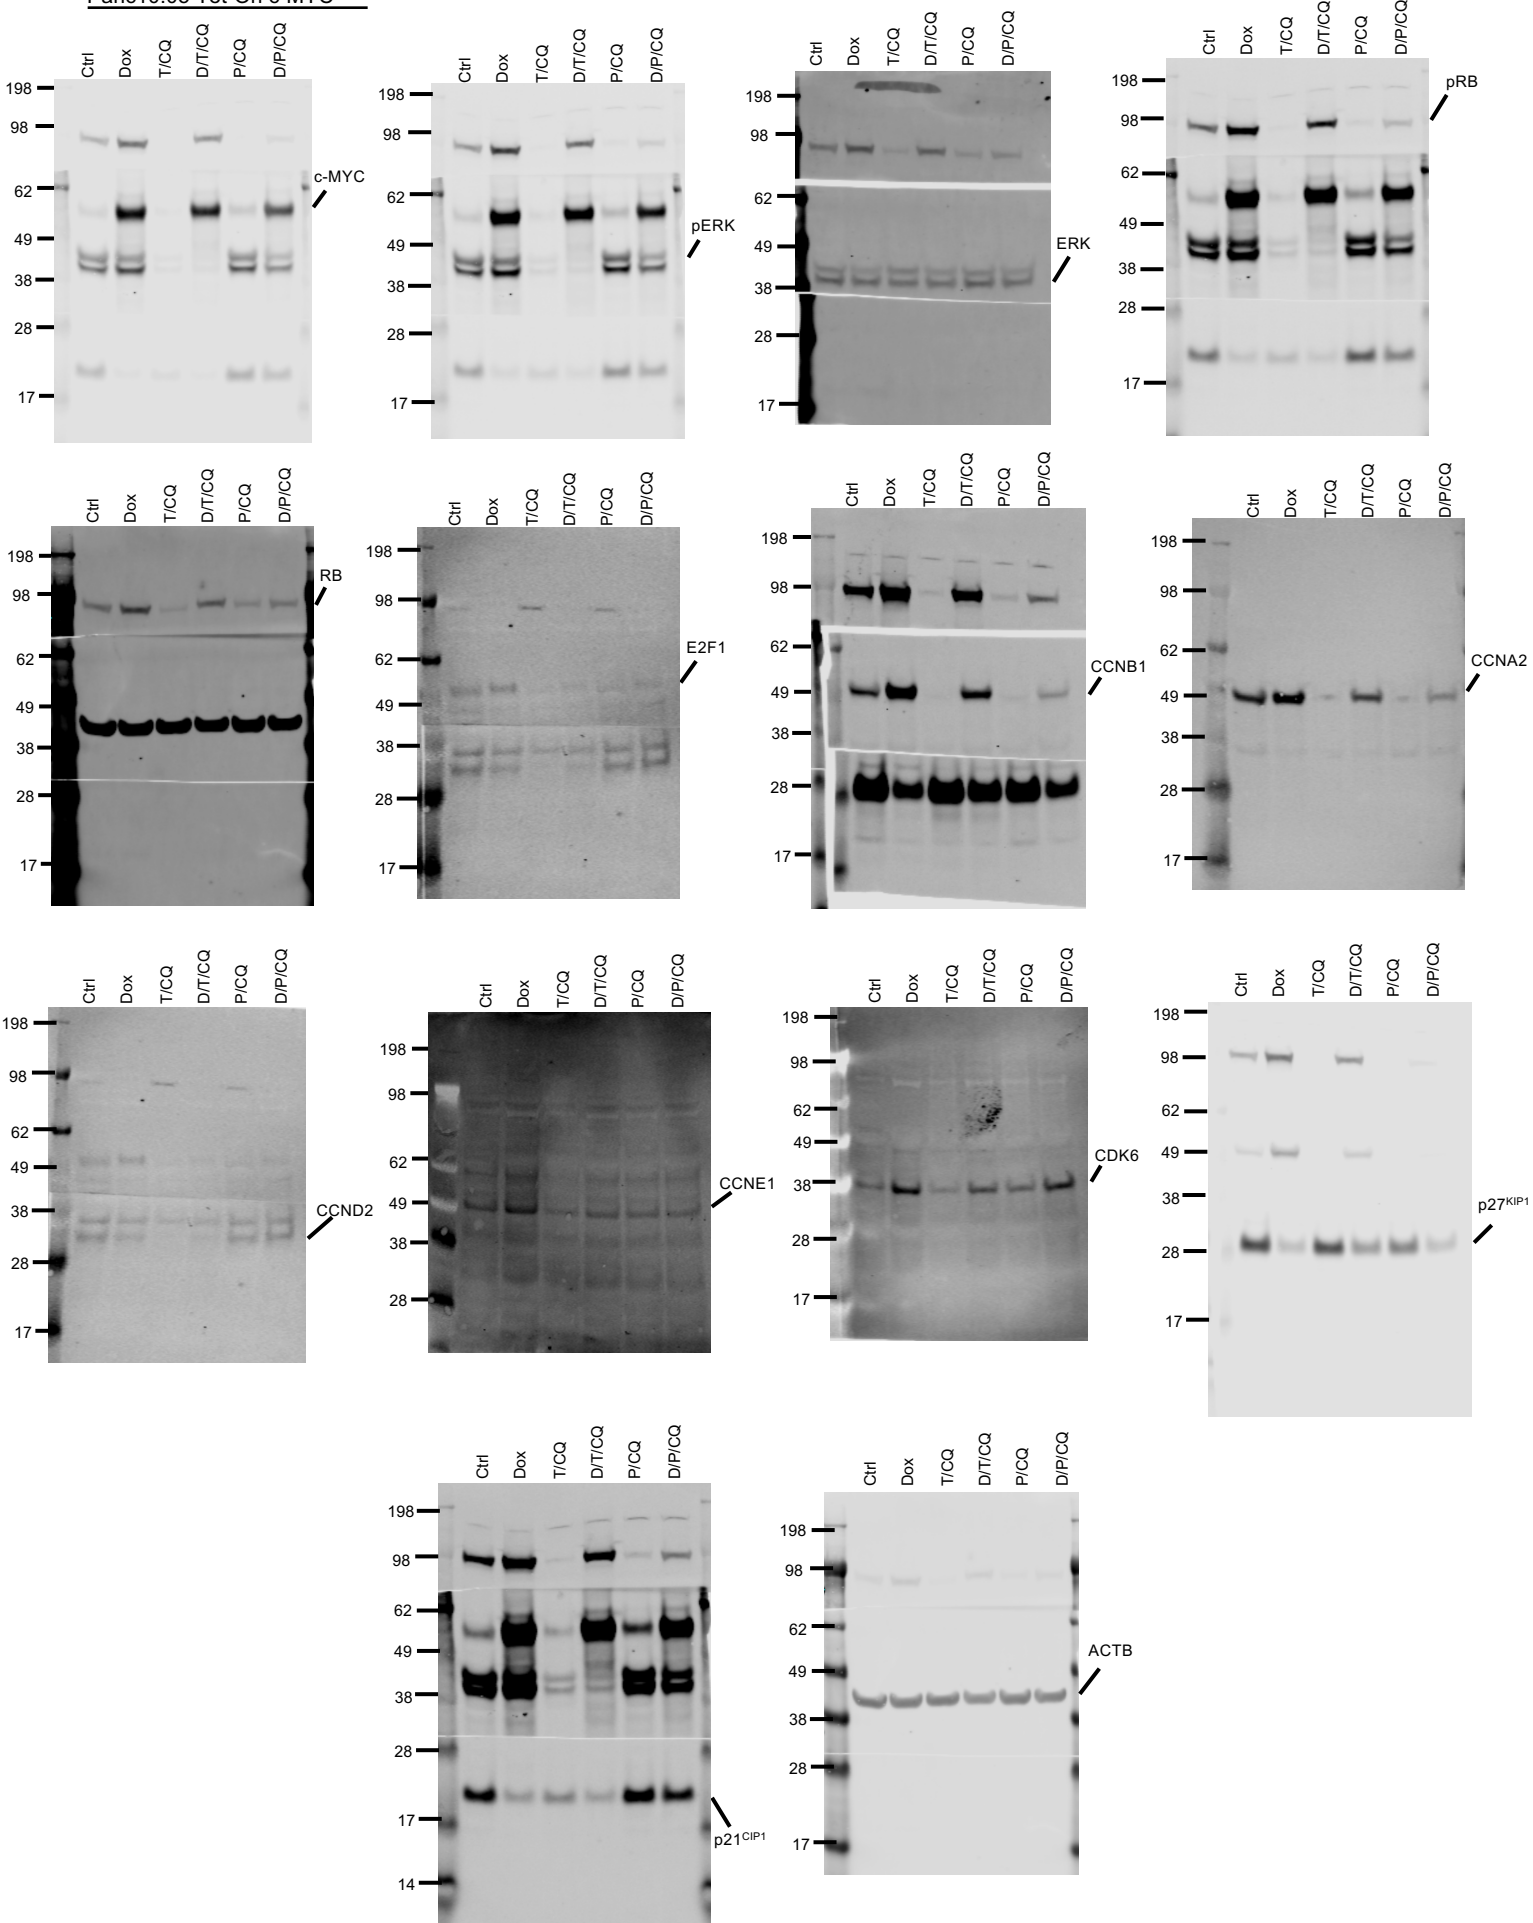

FS21 HPAF-II Tet-On c-MYC<sup>T58A</sup>

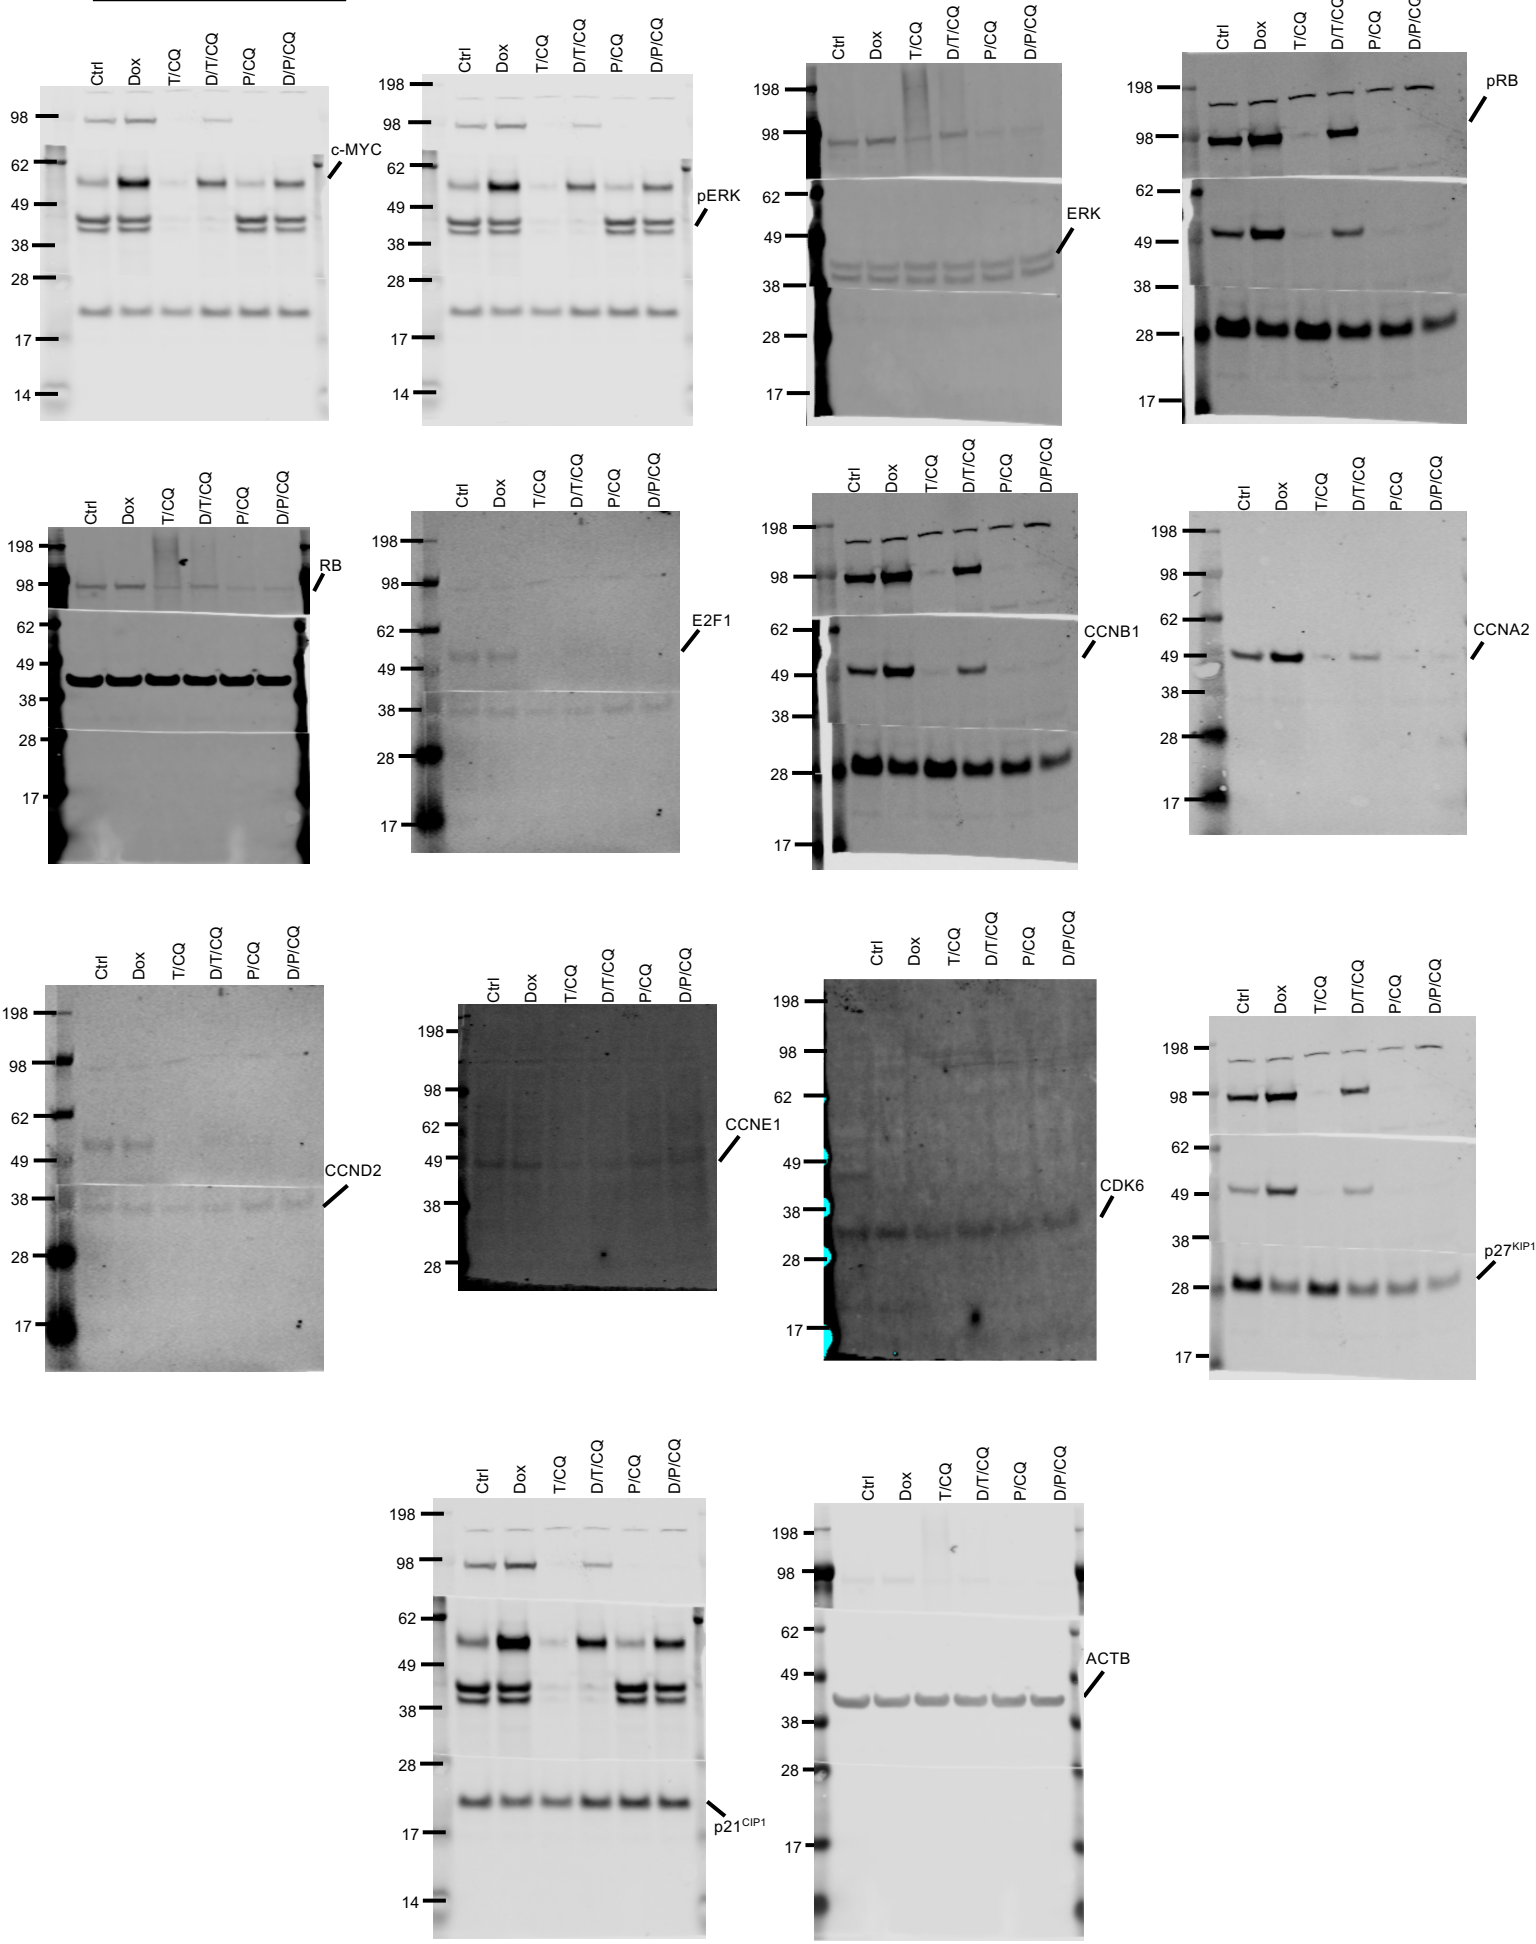



FS2J PDX220 Tet-On c-MYC<sup>T58A</sup>

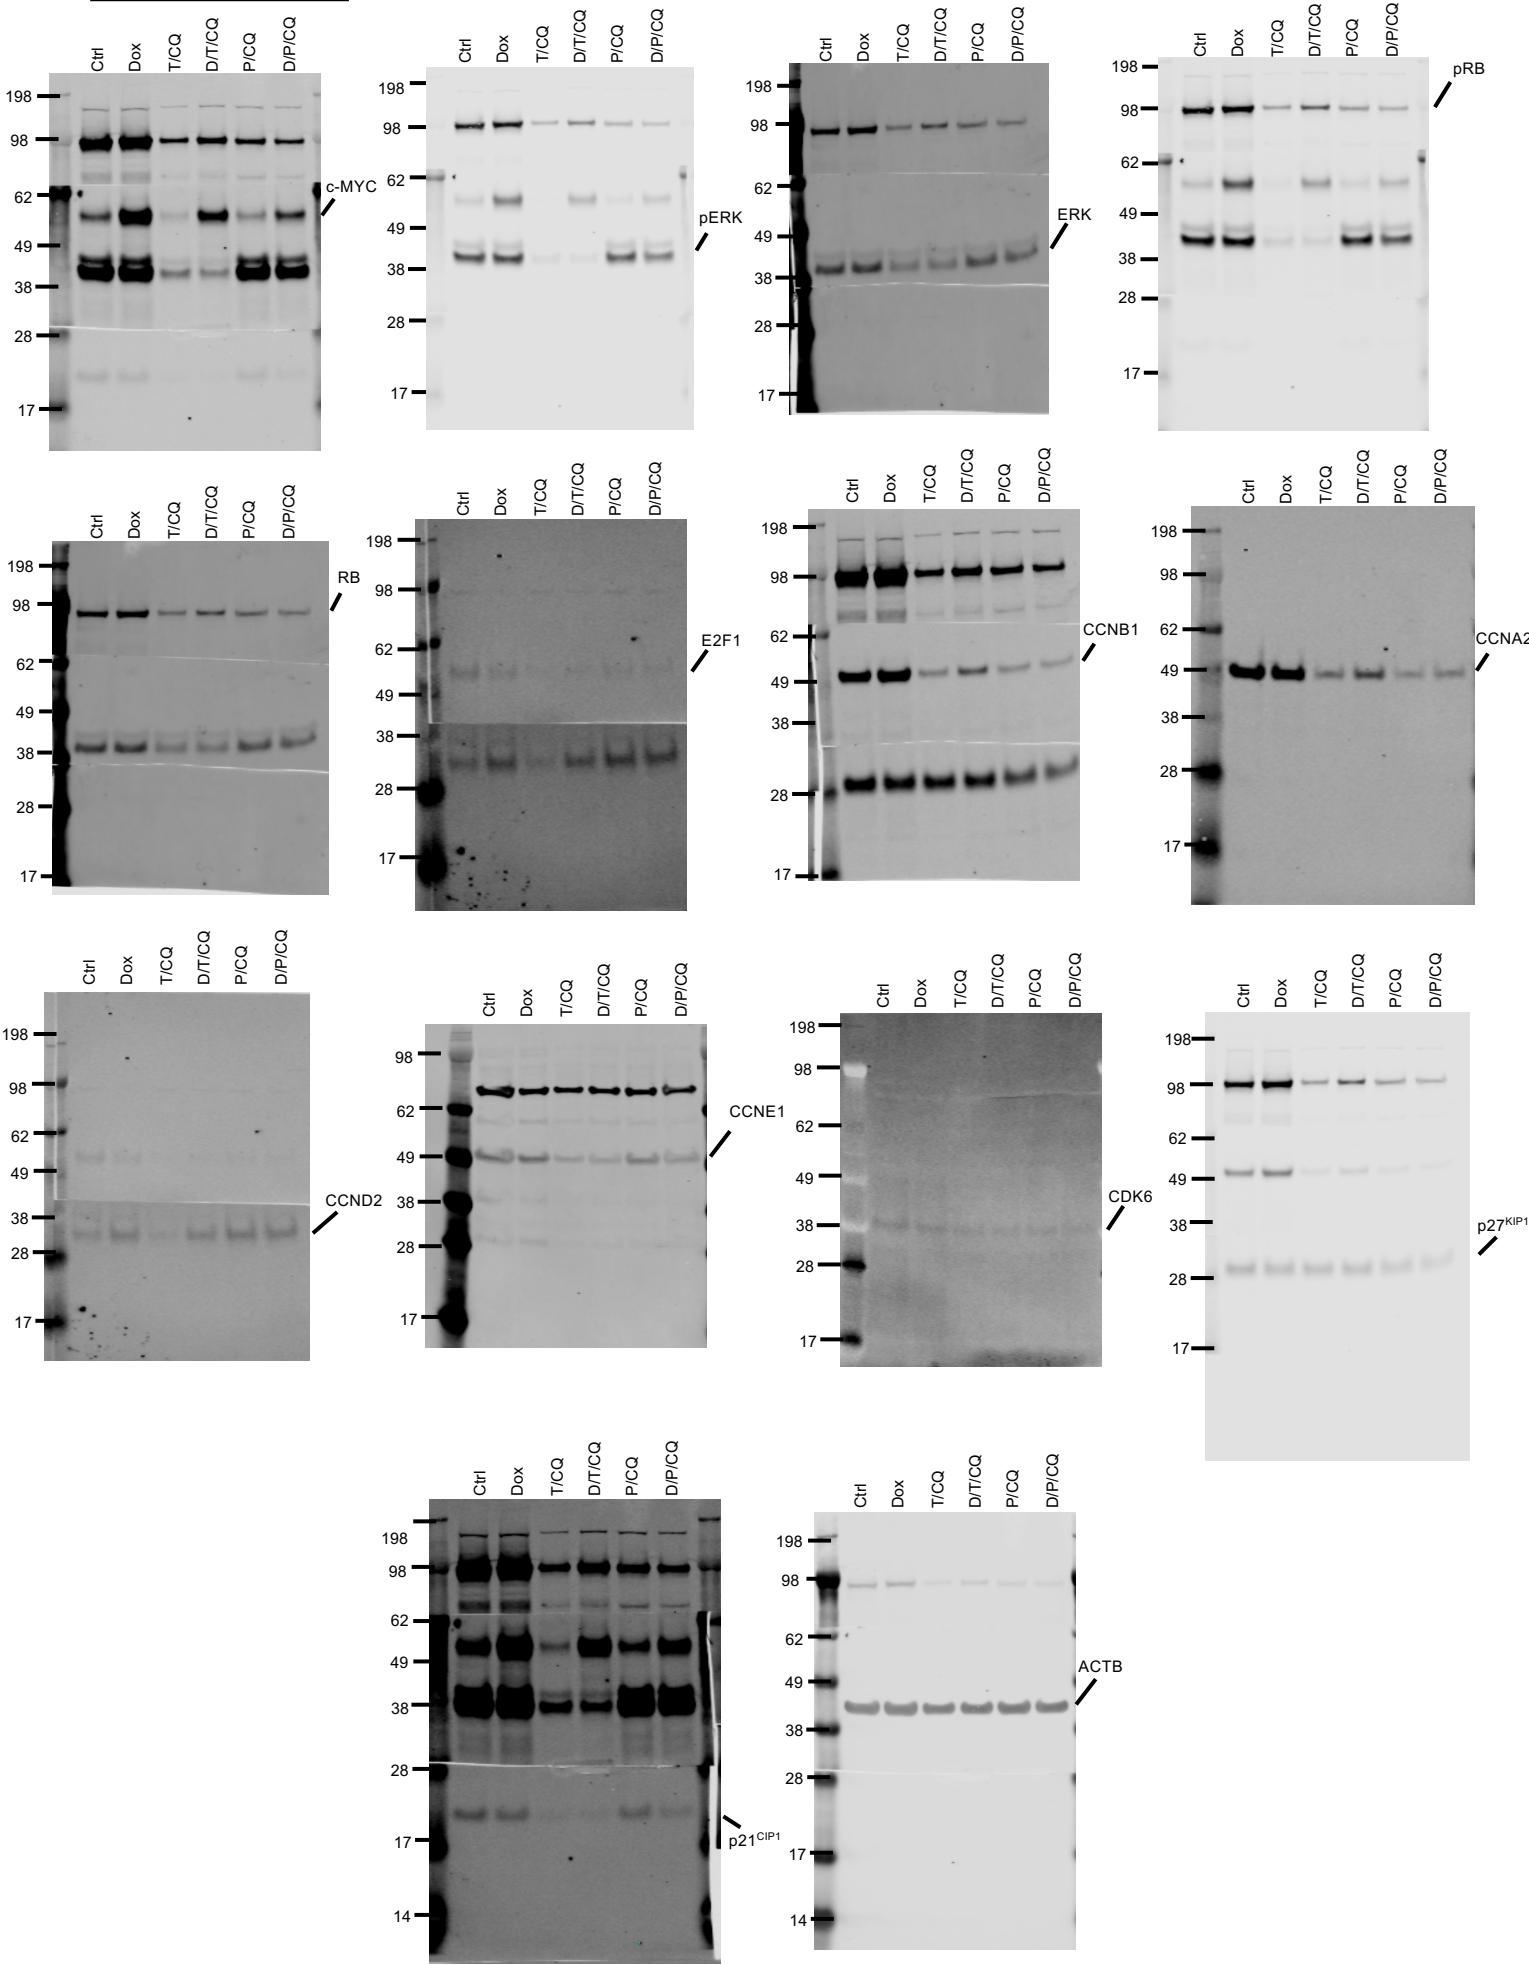

**FS2K**  
**HPAF-II Tet-On c-MYC**

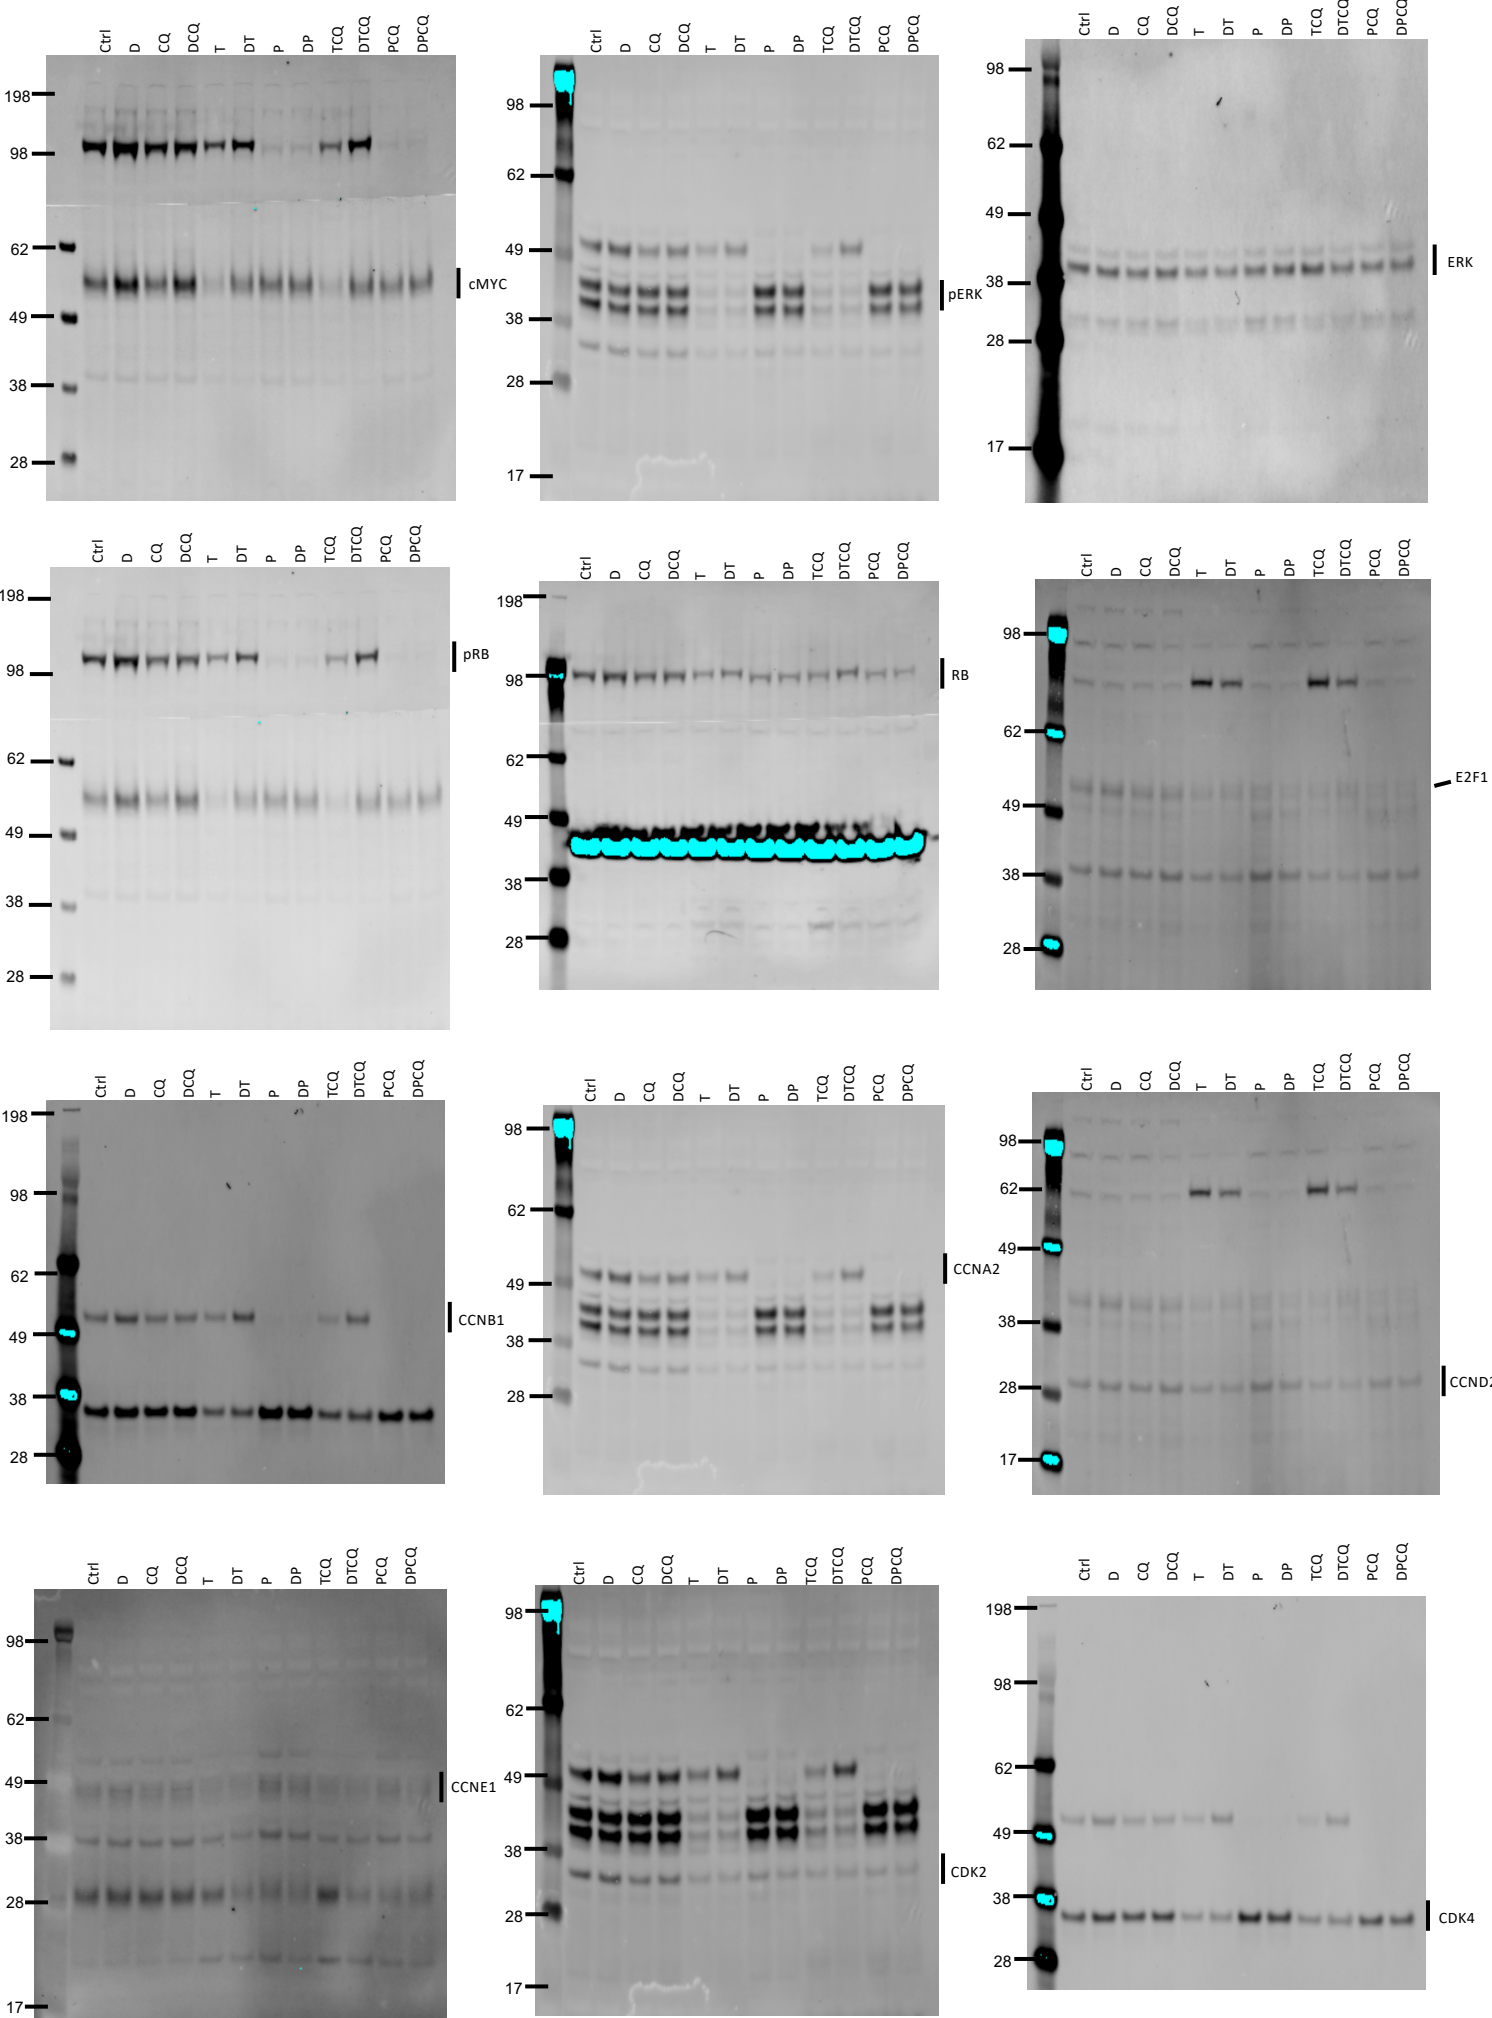

HPAF-II Tet-On c-MYC

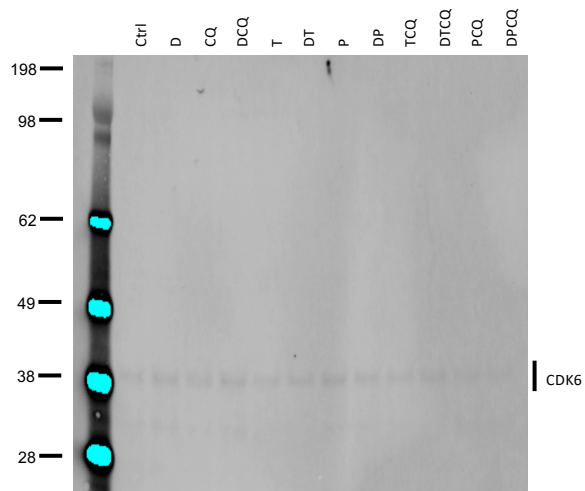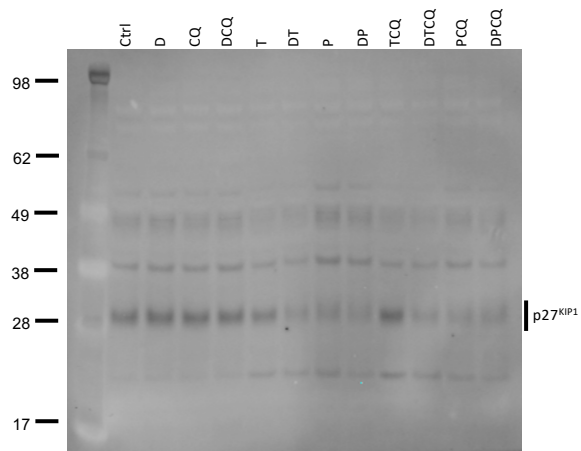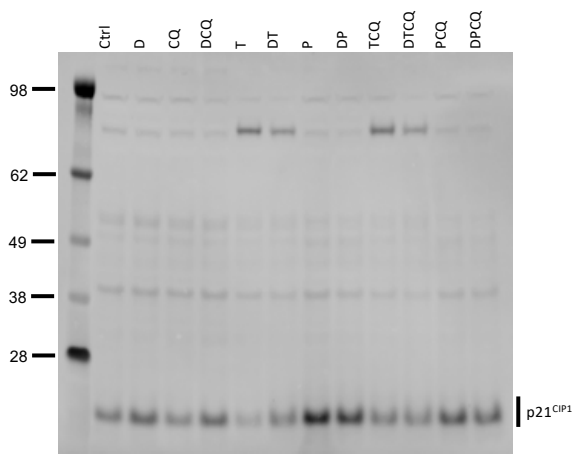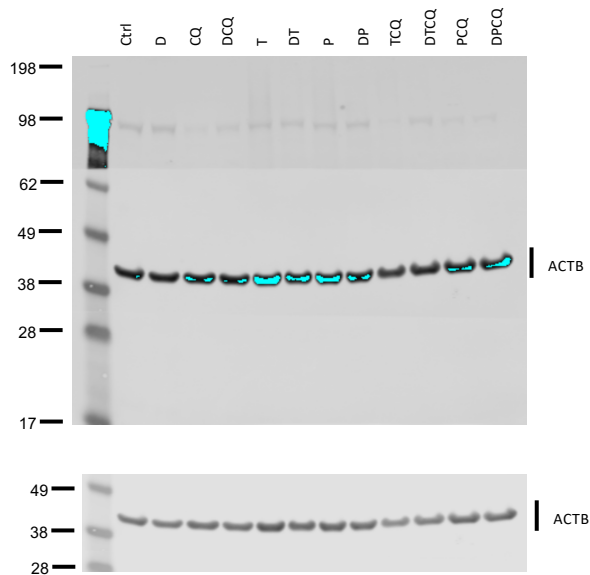

PDX220 Tet-On c-MYC

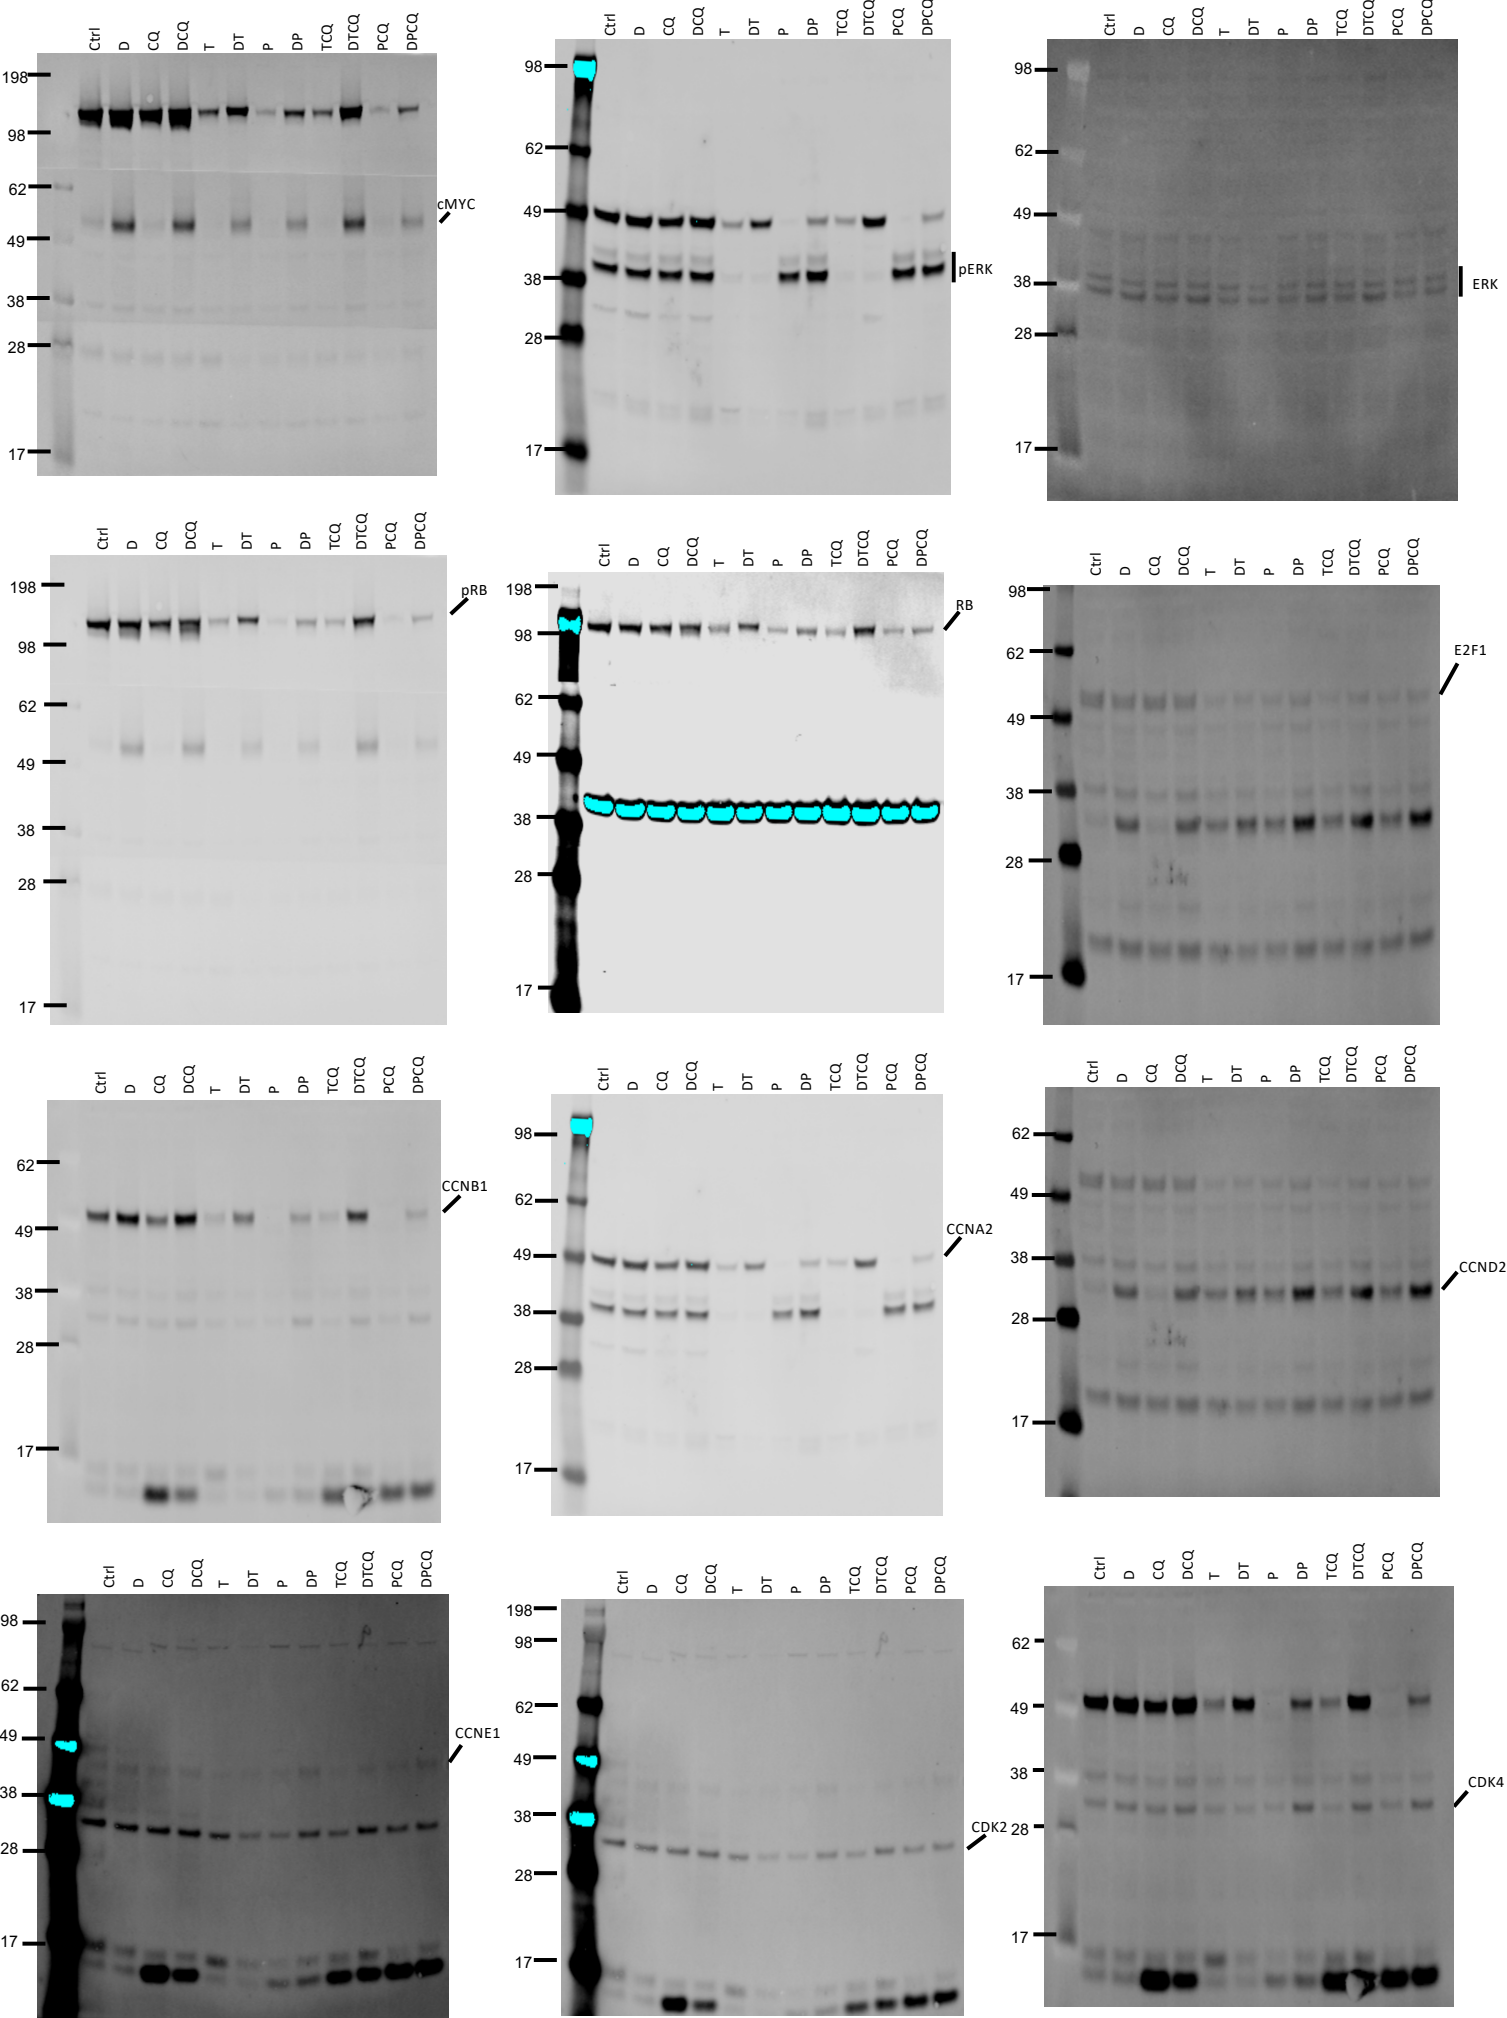



PDX220 Tet-On c-MYC

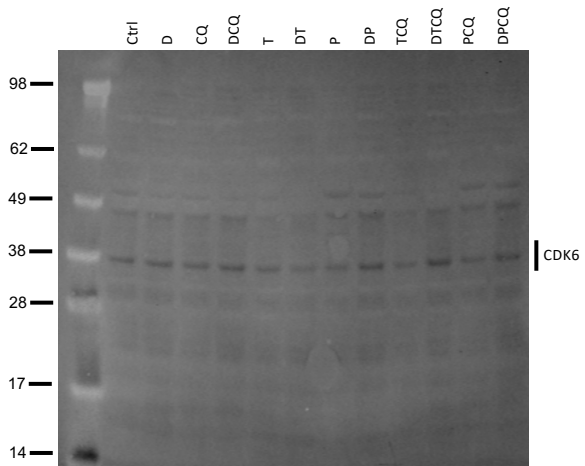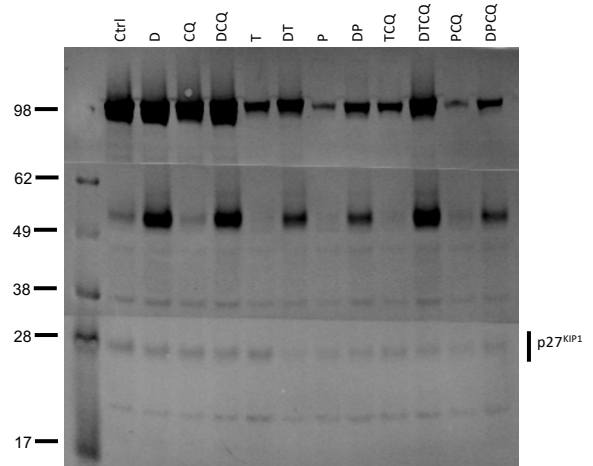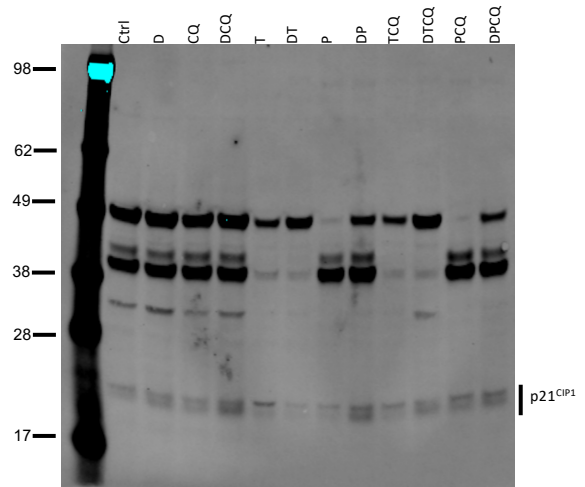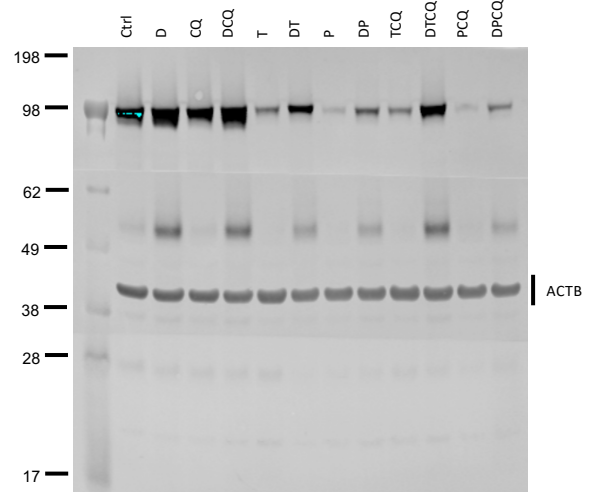

Supplement: JEM_20221524_SourceDataFS2.pdf [file JEM_20221524_SourceDataFS2.pdf]
